# Supplementary material for: Dielectrophoresis Multipath Focusing of Microparticles through Perforated Electrodes in Microfluidic Channels
Source: MDPI journal article supplement (doi:10.3390/bios9030099), 2019-08-07
Supplement: s1 [file s1]

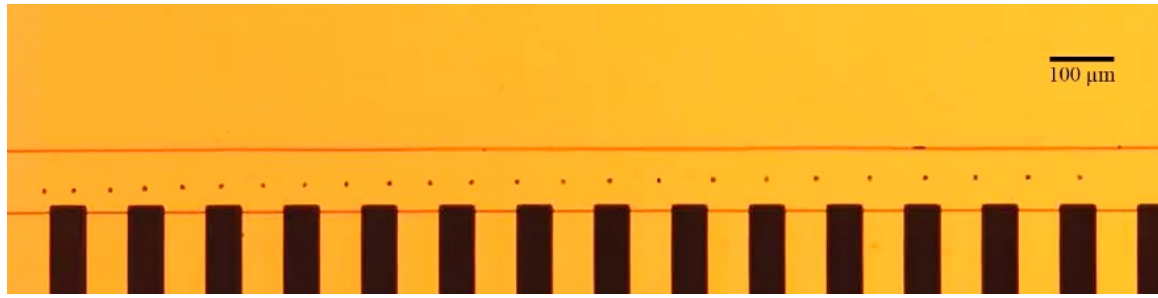

(a)

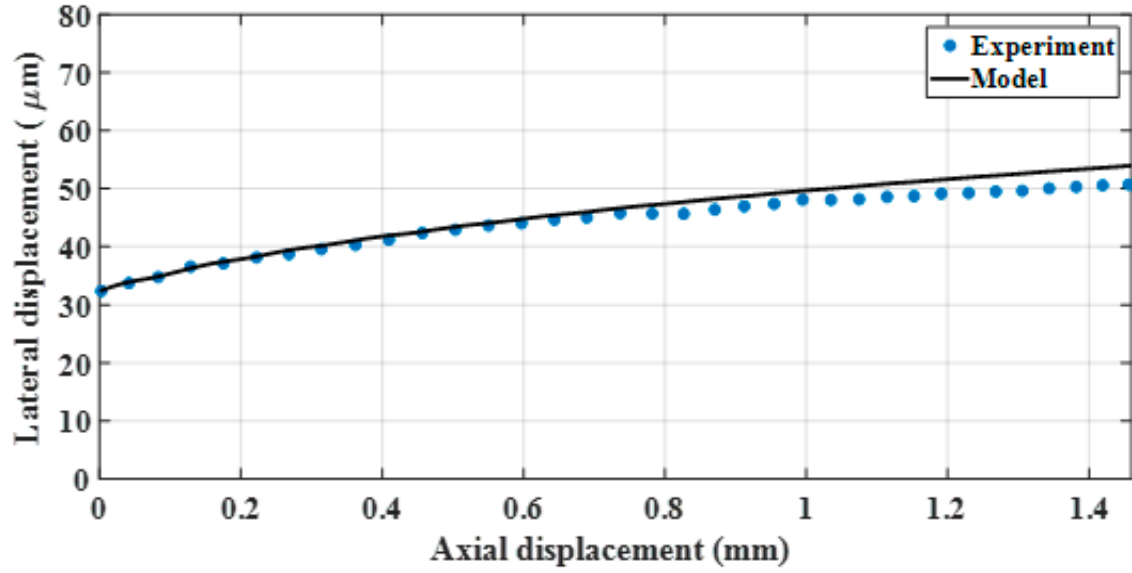

(b)

**Figure S1.** (a) Experimental trajectory of single RBC using interdigitated electrodes. The dark rectangles represent the electrodes; (b) comparison between the experimental actual path of RBC and the model result (Experiment: electrode width:  $\sim 60 \mu\text{m}$ . electrode gap:  $\sim 60 \mu\text{m}$ , channel width:  $\sim 80 \mu\text{m}$ . channel height:  $\sim 30 \mu\text{m}$ , flow rate:  $5 \mu\text{L/hr}$ , applied voltage and frequency:  $10 V_{pp}$  @ $10\text{KHz}$ ; Model: same operational and geometrical conditions as experiment, particle diameter:  $5.6 \mu\text{m}$ ).
